# Supplementary material for: Towards routine high-throughput analysis of fecal bile acids: validation of an enzymatic cycling method for the quantification of total bile acids in human stool samples on fully automated clinical chemistry analyzers
Source: publisher site journal article supplement (doi:10.1515/cclm-2024-1414), 2025-01-22

**Supplementary Table S1.** Reagents for the quantitative *in vitro* determination of total bile acids in stool samples.

|                       | Total bile acids 21 FS (stool)                        | IDK® Bile Acids Photometric Kit (stool)         |
|-----------------------|-------------------------------------------------------|-------------------------------------------------|
| <b>Manufacturer</b>   | DiaSys Diagnostic Systems GmbH<br>(Holzheim, Germany) | Immundiagnostik AG<br>(Bensheim, Germany)       |
| <b>Catalog number</b> | 1 2238 99 10 921                                      | K 7878W                                         |
| <b>Lot numbers</b>    | 30970 (Lot 1), 32893 (Lot 2), 31665 (Lot 3)           | R1 211-068, R2 211-069                          |
| <b>Matrix</b>         | Stool                                                 | Stool                                           |
| <b>Calibrator</b>     | TruCal TBA (40.3 µmol/L; Cat #1 2240 99 10 037)       | STD, ready-to-use (0; 6; 12; 24; 48; 96 µmol/L) |
| <b>Controls</b>       | TruLab N (8.3 µmol/L; Cat #5 9000 99 10 061)          | CTRL1, ready-to-use (9.7 µmol/L)                |
|                       | TruLab P (32.4 µmol/L; Cat #5 9000 99 10 061)         | CTRL2, ready-to-use (30 µmol/L)                 |

**Supplementary Table S2.** Performance characteristics (stool samples).

|                                                                     |                               | Total bile acids 21 FS (stool) | IDK® Bile Acids Photometric Kit (stool) |
|---------------------------------------------------------------------|-------------------------------|--------------------------------|-----------------------------------------|
| <b>Linearity<sup>1</sup></b>                                        |                               | 3.5 – 130 µmol/L               | 1.89 – 54.83 µmol/L                     |
| <b>Detection capability<sup>2</sup></b>                             | Limit of blank (LoB)          | 0.16 µmol/L                    | 0.34 µmol/L                             |
|                                                                     | Limit of detection (LoD)      | 1 µmol/L                       | 1.89 µmol/L                             |
|                                                                     | Limit of quantification (LoQ) | 3.5 µmol/L                     | 1.89 µmol/L                             |
| <b>Within-run precision<sup>3</sup></b><br>(Repeatability)          | Samples                       | n = 20                         | n = 40                                  |
|                                                                     | Levels (concentration)        | 3 (14.7, 70.8, 115 µmol/L)     | 2 (8.13, 25.86 µmol/L)                  |
|                                                                     | CVs                           | 1.1 – 2.1 %                    | 3.4 – 5.2 %                             |
| <b>Within-laboratory precision<sup>3</sup></b><br>(Total precision) | Samples                       | n = 80                         | n.d.                                    |
|                                                                     | Levels (concentration)        | 3 (14.8, 72.5, 120 µmol/L)     |                                         |
|                                                                     | CVs                           | 3.44 – 4.09 %                  |                                         |
| <b>Reproducibility<sup>3</sup></b>                                  | Samples                       | n = 75                         | n = 22                                  |
|                                                                     | Levels (concentration)        | 3 (15.0, 74.2, 125 µmol/L)     | 2 (8.46, 27.04 µmol/L)                  |
|                                                                     | CV                            | 3.01 – 4.08 %                  | 5.4 – 5.9 %                             |

|                                                 |                             | Total bile acids 21 FS (stool)                       | IDK® Bile Acids Photometric Kit (stool) |
|-------------------------------------------------|-----------------------------|------------------------------------------------------|-----------------------------------------|
| <b>Interferences<sup>4</sup><br/>≤10% up to</b> | Ascorbic acid               | 1.2 mg/dL                                            | no interference observed                |
|                                                 | Bilirubin                   | 0.74 mg/dL (conjugated)<br>0.68 mg/dL (unconjugated) | no interference observed                |
|                                                 | Hemoglobin                  | 12 mg/dL                                             | no interference observed                |
|                                                 | Immunoglobulin A (IgA)      | 3 mg/dL                                              | n.d.                                    |
|                                                 | Triglycerides               | 24 mg/dL                                             | no interference observed                |
| <b>Stability<sup>5</sup></b>                    | Onboard (with chimneys)     | 14 days                                              | n.d.                                    |
|                                                 | Calibration (with chimneys) | 7 days                                               | n.d.                                    |

Evaluated according to the following CLSI guidelines: <sup>1</sup> EP06 (2<sup>nd</sup> Edition), <sup>2</sup> EP17 (2<sup>nd</sup> Edition), <sup>3</sup> EP05 (3<sup>rd</sup> Edition), <sup>4</sup> EP07 (3<sup>rd</sup> Edition), and <sup>5</sup> EP25.

**Supplementary Table S3.** Application parameters (stool samples).

|                       | <b>BioMajesty® JCA-BM6010/C</b><br>Automated random access analyzer<br>(up to 1.200 tests/hour) |                  | <b>respons® 910</b><br>Benchtop clinical chemistry<br>analyzer (up to 150 tests/hour) | <b>respons® 940</b><br>Automated random access<br>analyzer (up to 640 tests/hour) | <b>Tecan Sunrise™</b><br>Microplate reader |
|-----------------------|-------------------------------------------------------------------------------------------------|------------------|---------------------------------------------------------------------------------------|-----------------------------------------------------------------------------------|--------------------------------------------|
| <b>Assay</b>          | IDK® Bile Acids                                                                                 | DiaSys TBA 21 FS | DiaSys TBA 21 FS                                                                      | DiaSys TBA 21 FS                                                                  | IDK® Bile Acids                            |
| <b>Reagent 1</b>      | 90 µL                                                                                           | 90 µL            | 180 µL                                                                                | 180 µL                                                                            | 150 µL                                     |
| <b>Reagent 2</b>      | 30 µL                                                                                           | 30 µL            | 60 µL                                                                                 | 60 µL                                                                             | 50 µL                                      |
| <b>Sample volume</b>  | 3 µL                                                                                            | 1.3 µL           | 5 µL                                                                                  | 3 µL                                                                              | 10 µL                                      |
| <b>Reading cycles</b> | 25 / 32                                                                                         | 25 / 32          | 29 / 40                                                                               | 33 / 44                                                                           | n/a                                        |
| <b>Wavelength</b>     | 410 / 596 nm                                                                                    | 410 / 596 nm     | 405 / 600 nm                                                                          | 415 / 600 nm                                                                      | 405 nm / 620 nm                            |

**Supplementary Table S4.** Within-run precision (repeatability; n=20) of DiaSys TBA 21 FS on three different clinical chemistry analyzers.

| Analyzer                                                              |               | Sample 1<br>(stool) | Sample 2<br>(stool) |
|-----------------------------------------------------------------------|---------------|---------------------|---------------------|
| <b>respons<sup>®</sup> 910</b><br>Benchtop                            | Mean [μmol/L] | 17.8                | 140                 |
|                                                                       | CV [%]        | <b>2.22</b>         | <b>1.98</b>         |
| <b>BioMajesty<sup>®</sup> JCA-BM6010/C</b><br>Automated random access | Mean [μmol/L] | 17.5                | 144                 |
|                                                                       | CV [%]        | <b>1.04</b>         | <b>0.60</b>         |
| <b>respons<sup>®</sup> 940</b><br>Automated random access             | Mean [μmol/L] | 17.4                | 142                 |
|                                                                       | CV [%]        | <b>1.41</b>         | <b>0.58</b>         |

**Supplementary Figure S1.** Linearity assessment for TBA 21 FS run on respons<sup>®</sup> 910. The linear range of the Total bile acids 21 FS assay (DiaSys) was assessed according to CLSI acceptance criteria (CLSI EP05, 3<sup>rd</sup> Edition) by serial dilution of two different stool extracts for **(A)** lower linearity (0-50  $\mu\text{mol/L}$ ;  $\pm 15\%$  deviation) and **(B)** upper linearity (0-170  $\mu\text{mol/L}$ ;  $\pm 10\%$  deviation).

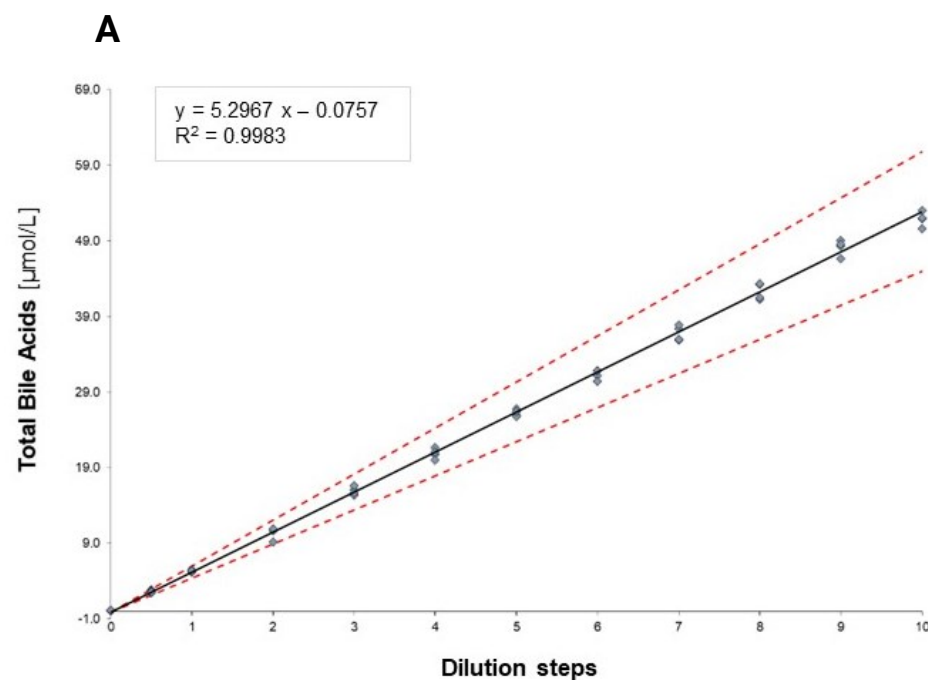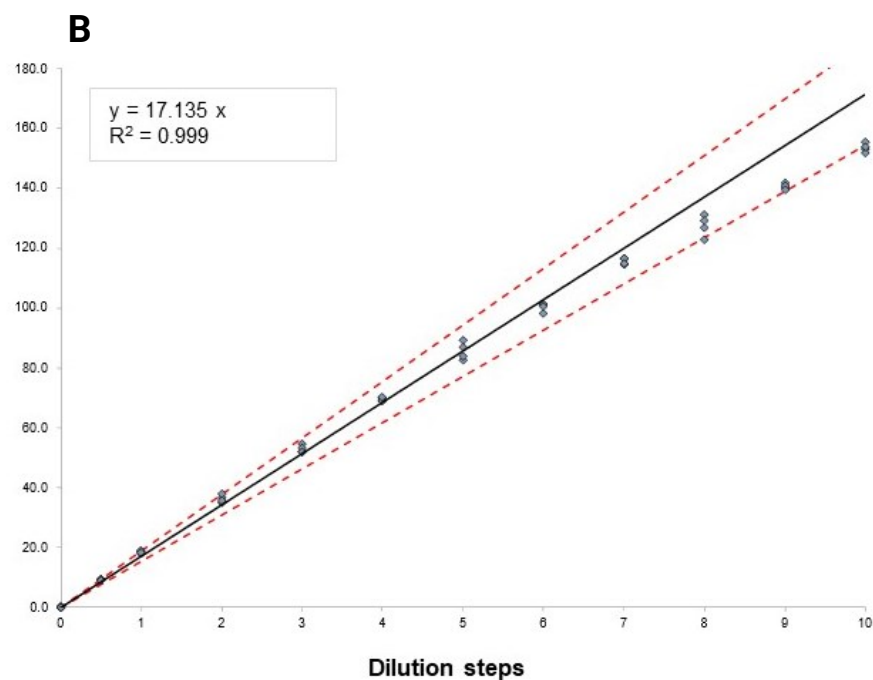

**Supplementary Figure S2.** Linearity assessment for TBA 21 FS run on respons<sup>®</sup> 940. A stool extract was spiked to a final concentration of 150  $\mu\text{mol/L}$ , serially diluted with IDK Extract<sup>®</sup> buffer, and each dilution was measured in duplicate (red dotted line:  $\pm 10\%$  deviation).

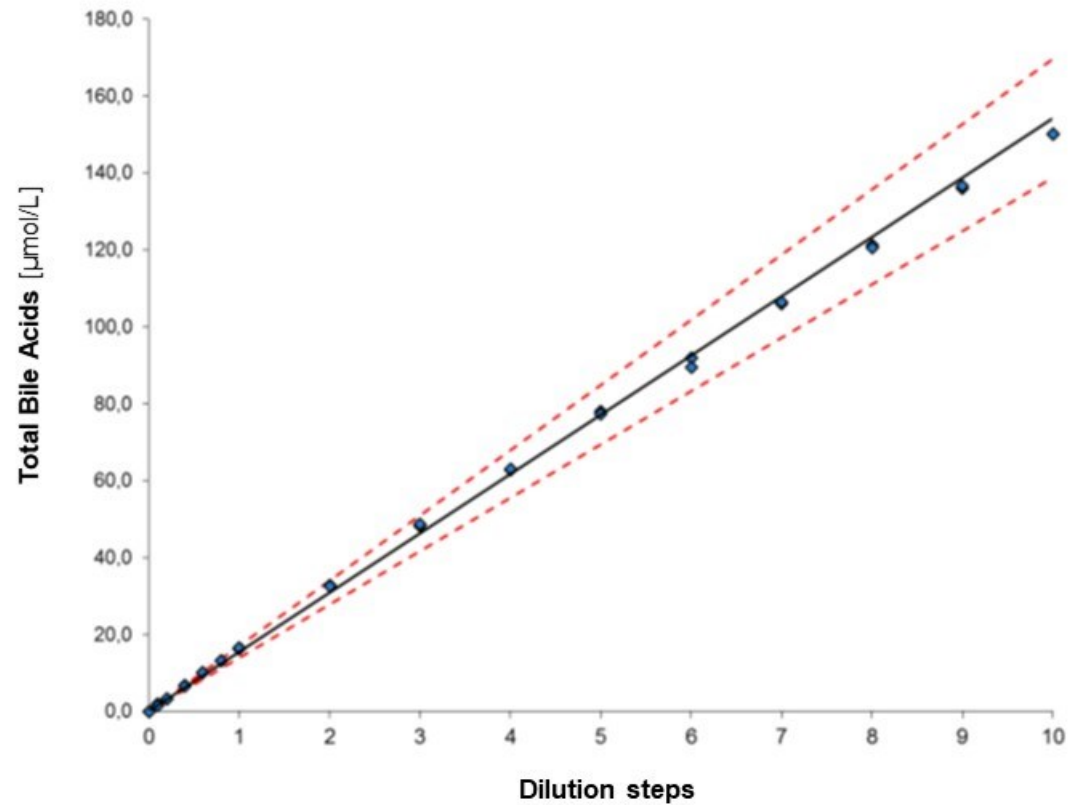

**Supplementary Figure S3.** Comparison of DiaSys TBA 21 FS run on different clinical chemistry analyzers. **(A)** respons<sup>®</sup> 940 vs. respons<sup>®</sup> 910 and **(B)** respons<sup>®</sup> 940 vs. BioMajesty<sup>®</sup> JCA-BM6010/C. Stool samples (n=20) were processed using a ready-to-use stool sampling device (IDK Extract<sup>®</sup> specimen tubes, Immundiagnostik AG, Bensheim, Germany) according to the manufacturer's instructions. The resulting stool extracts were measured on the indicated analyzers.

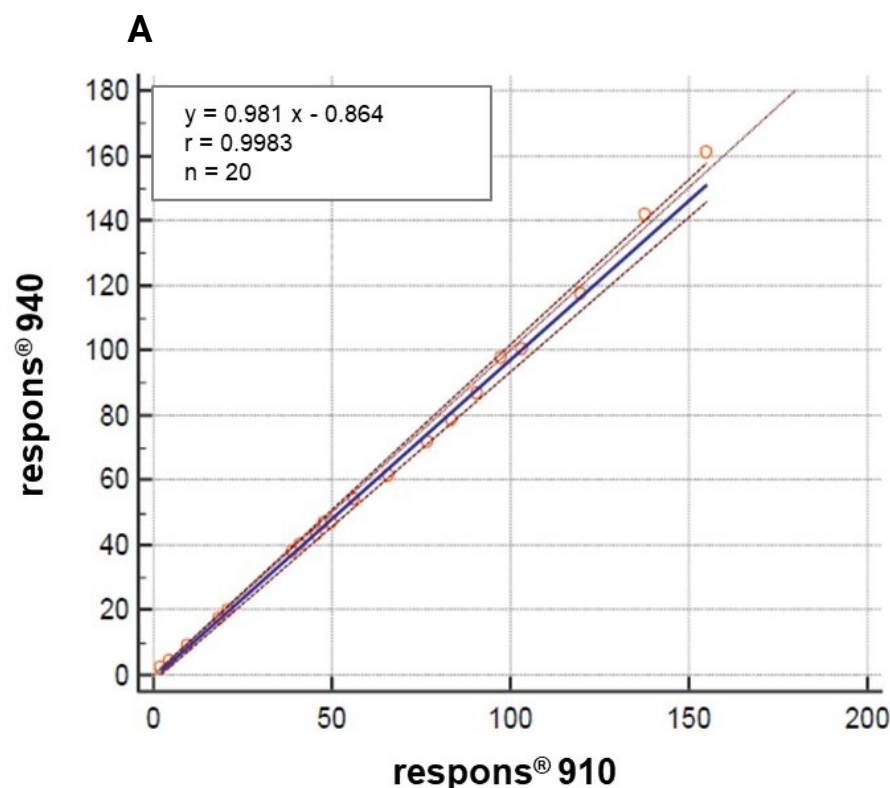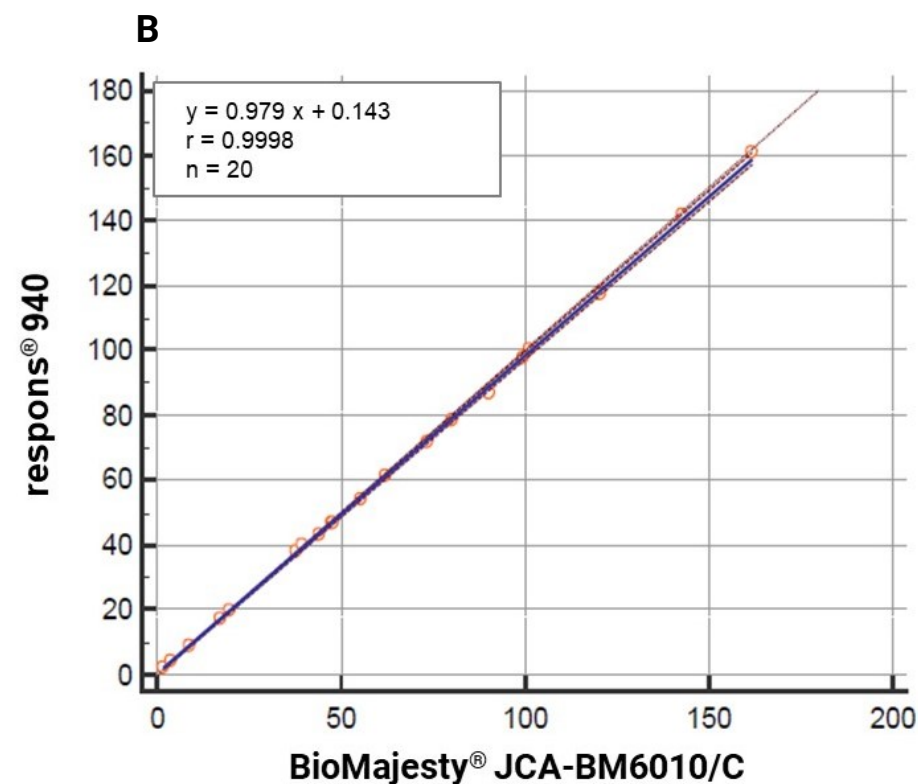

Supplement: Supplementary file 1 [file j_cclm-2024-1414_suppl_001.pdf]
